# Supplementary material for: A novel osteoporosis model with ascorbic acid deficiency in Akr1A1 gene knockout mice
Source: PubMed Central journal article supplement (PMC5352327; doi:10.18632/oncotarget.14458), 2017-01-02
Supplement: oncotarget-08-7357-s001.pdf [file oncotarget-08-7357-s001.pdf]

## A novel osteoporosis model with ascorbic acid deficiency in *Akr1A1* gene knockout mice

Cheng-Wei Lai<sup>1,2,\*</sup>, Hsiao-Ling Chen<sup>3,\*</sup>, Min-Yu Tu<sup>1,4,5</sup>, Wei-Yu Lin<sup>1,2</sup>, Theresa Röhrig<sup>1,2</sup>, Shang-Hsun Yang<sup>6</sup>, Ying-Wei Lan<sup>1,7</sup>, Kowit-Yu Chong<sup>7,8</sup> and Chuan-Mu Chen<sup>1,2,9</sup>

<sup>1</sup> Department of Life Sciences, National Chung Hsing University, Taichung, Taiwan

<sup>2</sup> Agricultural Biotechnology Center, National Chung Hsing University, Taichung, Taiwan

<sup>3</sup> Department of Bioresources, Da-Yeh University, Changhua, Taiwan

<sup>4</sup> Department of Orthopaedic Surgery, Taichung Armed Forces General Hospital, Taichung, Taiwan and National Defense Medical Center, Taipei, Taiwan

<sup>5</sup> Department of Biomedical Engineering, Hungkuang University, Taichung, Taiwan

<sup>6</sup> Department of Physiology, and Institute of Basic Medical Sciences, National Cheng Kung University, Tainan, Taiwan

<sup>7</sup> Department of Medical Biotechnology and Laboratory Science, College of Medicine, Chang Gung University, Tao-Yuan, Taiwan

<sup>8</sup> Department of Thoracic Medicine, Chang Gung Memorial Hospital at Linkou, Tao-Yuan, Taiwan

<sup>9</sup> Rong-Hsing Translational Medicine Center, and iEGG Center, National Chung Hsing University, Taichung, Taiwan

\* These authors have contributed equally to this study

**Correspondence to:** Chuan-Mu Chen, **email:** [chchen1@dragon.nchu.edu.tw](mailto:chchen1@dragon.nchu.edu.tw)

**Correspondence to:** Kowit-Yu Chong, **email:** [kchong@mail.cgu.edu.tw](mailto:kchong@mail.cgu.edu.tw)

**Keywords:** osteoporosis; *Akr1A1* gene; ascorbic acid; knockout mice; micro-CT imaging; trabecular bone; cortical bone; Pathology Section

**Received:** August 13, 2016

**Accepted:** December 07, 2016

**Published:** January 02, 2017

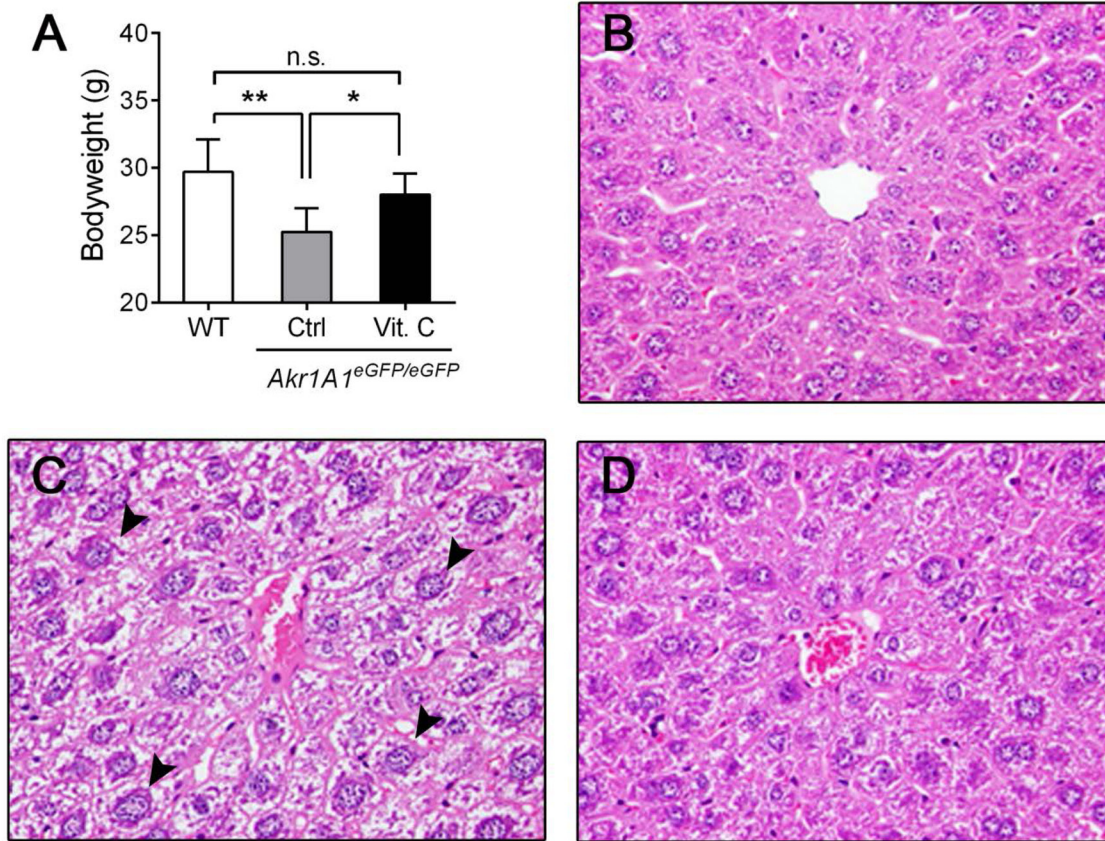

**Supplementary Figure S1.** Body weight and liver pathological changes of Akkr1A1 KO mice. (A) Body weights were measured at the end of treatment (12 weeks old). Liver tissues were collected for sectioning and H&E staining. The representative liver images are shown as (B) WT mice, (C) Akkr1A1 KO mice, and (D) Akkr1A1 KO mice + Vit C. Solid black arrowheads represented the aging of hepatocytes. Original magnification, 400x.
